# Supplementary material for: Prognostic value of B7-H3 expression in patients with solid tumors: a meta-analysis
Source: PubMed Central journal article supplement (PMC5696251; doi:10.18632/oncotarget.21114), 2017-09-21
Supplement: oncotarget-08-93156-s001.pdf [file oncotarget-08-93156-s001.pdf]

## Prognostic value of B7-H3 expression in patients with solid tumors: a meta-analysis

### SUPPLEMENTARY MATERIALS

#### Supplementary Table 1: Newcastle-Ottawa Scale (NOS) for quality assessment in meta-analysis

##### Selection

- 1) Representativeness of the exposed cohort
  - a) truly representative of the average (describe) in the community ★
  - b) somewhat representative of the average in the community ★
  - c) selected group of users (e.g., nurses, volunteers)
  - d) no description of the derivation of the cohort
- 2) Selection of the non-exposed cohort
  - a) drawn from the same community as the exposed cohort ★
  - b) drawn from a different source
  - c) no description of the derivation of the non-exposed cohort
- 3) Ascertainment of exposure
  - a) secure record (e.g., surgical records) ★
  - b) structured interview ★
  - c) written self-report
  - d) no description
- 4) Demonstration that outcome of interest was not present at start of study
  - a) yes ★
  - b) no

##### Comparability

- 1) Comparability of cohorts based on the design or analysis
  - a) study controls for (select the most important factor) ★
  - b) study controls for any additional factor ★ (This criterion could be modified to indicate specific control for a second important factor.)

##### Outcome

- 1) Assessment of outcome
  - a) independent blind assessment ★
  - b) record linkage ★
  - c) self-report
  - d) no description
- 2) Follow-up was long enough for outcomes to occur
  - a) yes (select an adequate follow-up period for the outcome of interest) ★
  - b) no
- 3) Adequacy of follow-up of cohorts
  - a) complete follow-up - all subjects accounted for ★
  - b) subjects lost to follow-up unlikely to introduce bias - small number lost – >75% (select an adequate %) or a description of those lost ★
  - c) follow-up rate < 25% (select an adequate %) and no description of those lost
  - d) no

A study can be awarded a maximum of one star for each numbered item within the Selection and Outcome categories. A maximum of two stars can be given for Comparability.

**Supplementary Table 2: Quality assessment of the 28 included studies with Newcastle-Ottawa Scale**

| Author                  | Year | Country | Cancer         | Selection | Comparability | Outcome | NOS |
|-------------------------|------|---------|----------------|-----------|---------------|---------|-----|
| Xu et al. [6]           | 2010 | China   | NSCLC          | ★★★       | ★★            | ★★      | 7   |
| Brunner et al. [13]     | 2012 | Austria | Endometrial    | ★★★       | ★★            | ★★      | 7   |
| Wu et al. [12]          | 2006 | China   | Gastric        | ★★★       | ★★            | ★★      | 7   |
| Huang et al. [16]       | 2016 | China   | Cervical       | ★★★       | ★★            | ★★★     | 8   |
| Chen et al. [17]        | 2015 | China   | Oral           | ★★★       | ★             | ★★      | 6   |
| Xu et al. [18]          | 2013 | China   | Pancreatic     | ★★★       | ★★            | ★★      | 7   |
| Wang et al. [19]        | 2013 | China   | Osteosarcoma   | ★★★       | ★★            | ★★      | 7   |
| Wang et al. [20]        | 2016 | China   | Esophageal     | ★★★       | ★★            | ★★★     | 8   |
| Chen et al. [21]        | 2015 | China   | Esophageal     | ★★★       | ★★            | ★★      | 7   |
| Mao et al. [22]         | 2013 | China   | Colorectal     | ★★★       | ★             | ★★      | 6   |
| Martin Loos [23]        | 2009 | Germany | Pancreatic     | ★★★       | ★             | ★★      | 6   |
| Maeda et al. [24]       | 2014 | Japan   | Breast         | ★★        | ★★            | ★       | 5   |
| Sun et al. [25]         | 2012 | China   | Hepatocellular | ★★        | ★★            | ★★      | 6   |
| Arigami et al. [26]     | 2011 | Japan   | Gastric        | ★★★       | ★★            | ★★★     | 8   |
| Zang et al. [15]        | 2007 | USA     | Prostate       | ★★★       | ★★            | ★★★     | 8   |
| Zang et al. [10]        | 2010 | USA     | Ovarian        | ★★★       | ★             | ★★★     | 7   |
| Chen et al. [27]        | 2014 | China   | Pancreatic     | ★★★       | ★             | ★★★     | 7   |
| Jin et al. [28]         | 2015 | China   | NSCLC          | ★★★       | ★★            | ★       | 6   |
| Liu et al.[29]          | 2012 | Norway  | Prostate       | ★★★       | ★★            | ★★★     | 8   |
| Mao et al. [30]         | 2014 | China   | NSCLC          | ★★★       | ★★            | ★★★     | 8   |
| Zhou et al. [31]        | 2014 | China   | Colorectal     | ★★★       | ★★            | ★★      | 7   |
| Boorjian et al.[32]     | 2008 | USA     | UCB            | ★★★       | ★★            | ★★★     | 8   |
| Ingebrigtsen et al.[33] | 2014 | Norway  | Colorectal     | ★★        | ★             | ★★      | 5   |
| Luo et al.[34]          | 2017 | China   | Lung           | ★★        | ★★            | ★★      | 6   |
| Song et al.[35]         | 2016 | China   | Esophageal     | ★★★       | ★★            | ★★      | 7   |
| Fukuda et al.[36]       | 2016 | China   | RCC            | ★★★       | ★★            | ★★      | 7   |
| Liu et al.[37]          | 2016 | China   | Gallbladder    | ★★★       | ★             | ★★      | 6   |
| Inamura et al.[38]      | 2017 | Japan   | Lung           | ★★★       | ★★            | ★★      | 7   |

NOS: Newcastle-Ottawa Scale; NSCLC: non-small cell lung cancer; UCB: urothelial carcinoma of the bladder; RCC: renal cell carcinoma.
